# Supplementary material
Source: Springer Nature journal article supplement (https://www.springermedizin.de/resource/supplementary/12889_2009_2266_MOESM9_ESM.pdf/9485198)

## Supplement Figure 2

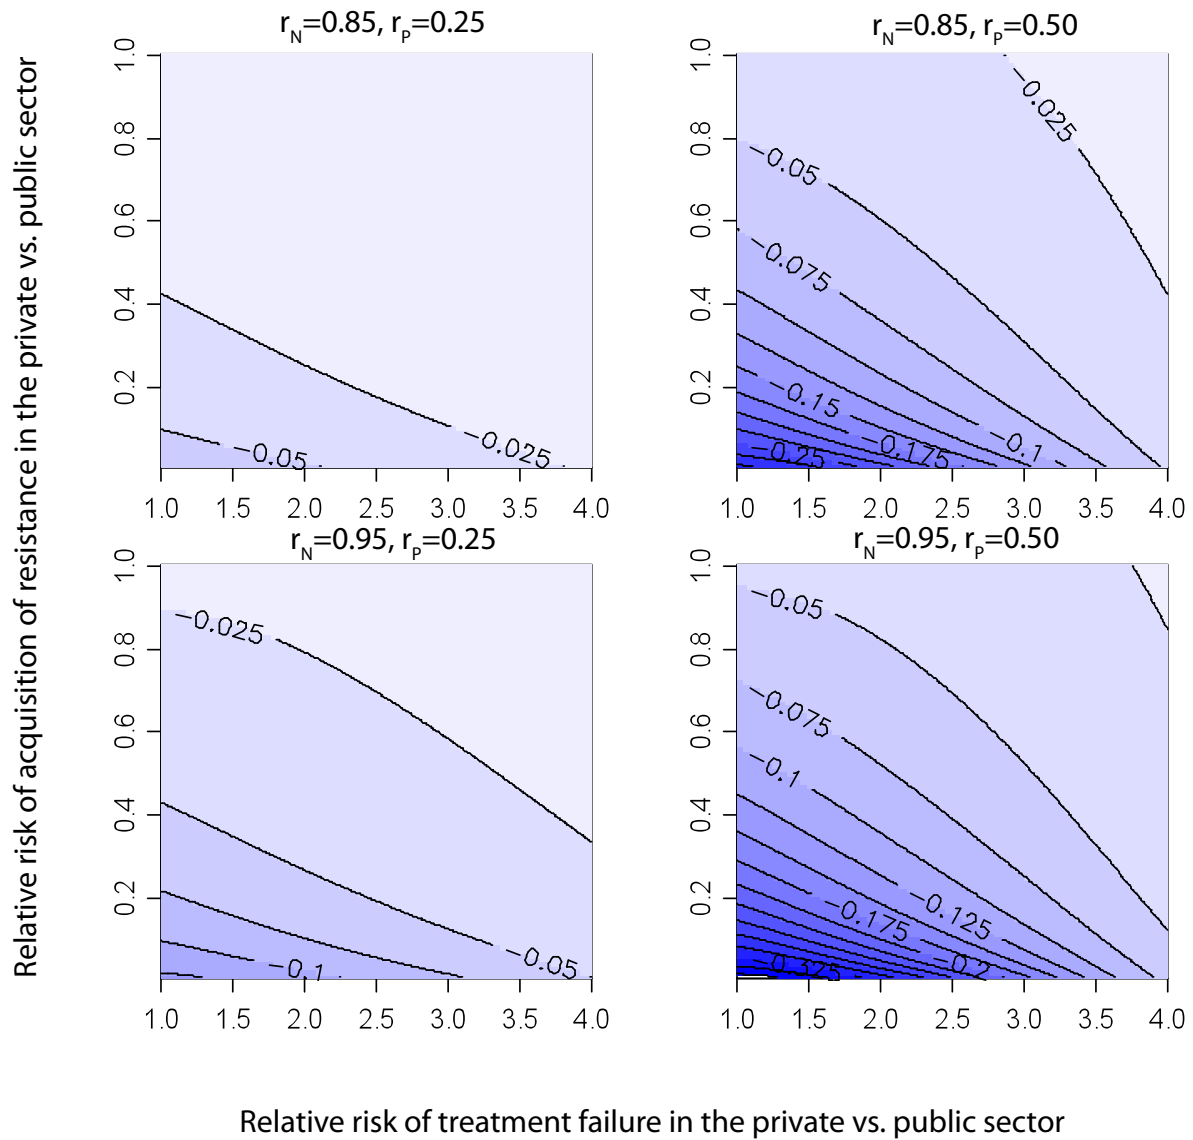

Supplement: MOESM9 [file 9485198]
